# Supplementary material for: Halloysite clay nanotubes based phase change material composites with excellent thermal stability for energy saving and storage
Source: Royal Society of Chemistry journal article supplement (doi:10.1039/c5ra27964j), 2016-01-01
Supplement: c5ra27964j1.pdf [file c5ra27964j1.pdf]

## Supporting information

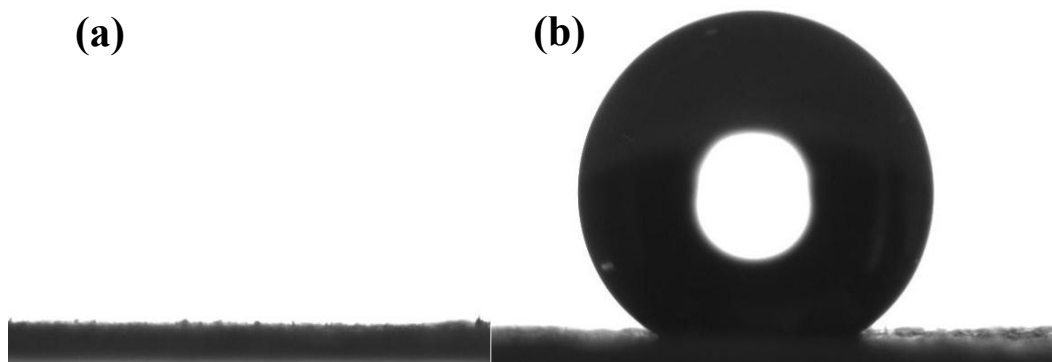

**Figure S1.** (a) Image of the oil CA for the PDMS-HNTs, (b) picture of the water CA for the PDMS-HNTs.

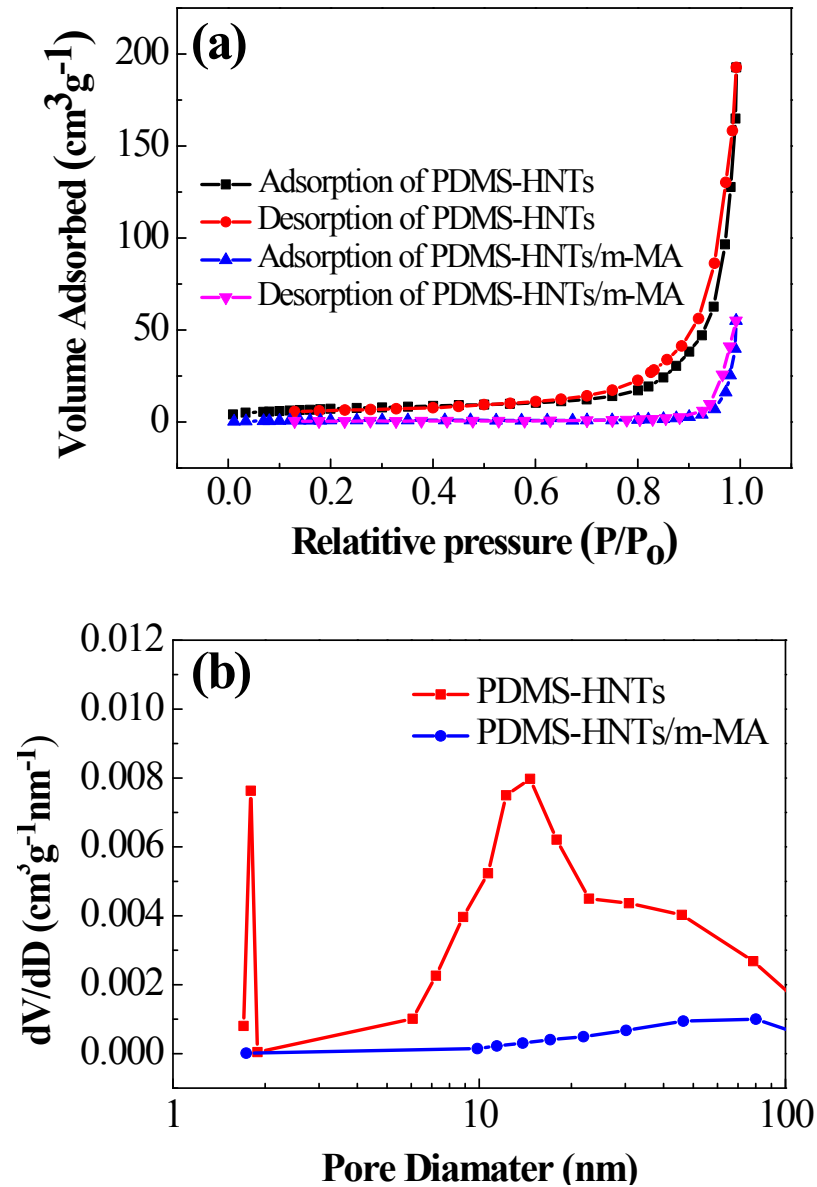

**Figure S2.** (a)  $N_2$  adsorption-desorption isotherms of PDMS-HNTs and PDMS-HNTs/m-MA composite measured at 77.3 K. (b) pore size distribution curves of PDMS-HNTs and PDMS-HNTs/m-MA composite.

**Table S1.** Abbreviations

| <b>Abbreviations</b>     | <b>Full name</b>                                             |
|--------------------------|--------------------------------------------------------------|
| PDMS                     | polydimethylsiloxane                                         |
| HNTs                     | Halloysite nanotubes                                         |
| p-HNTs                   | purified HNTs                                                |
| PDMS-HNTs                | PDMS modified HNTs                                           |
| MA                       | Myristic acid                                                |
| PA                       | palmitic acid                                                |
| SA                       | stearic acid (SA)                                            |
| p-HNTs/m-paraffin wax    | p-HNTs/paraffin wax composite by melt-impregnation method    |
| PDMS-HNTs/m-paraffin wax | PDMS-HNTs/paraffin wax composite by melt-impregnation method |
| p-HNTs/m-MA              | p-HNTs/MA composite by melt-impregnation method              |
| PDMS-HNTs/m-MA           | PDMS-HNTs/MA composite by melt-impregnation method           |
| p-HNTs/m-PA              | p-HNTs/PA composite by melt-impregnation method              |
| PDMS-HNTs/m-PA           | PDMS-HNTs/PA composite by melt-impregnation method           |
| p-HNTs/m-SA              | p-HNTs/SA composite by melt-impregnation method              |
| PDMS-HNTs/m-SA           | PDMS-HNTs/SA composite by melt-impregnation method           |
| CVD                      | chemical vapor deposition method                             |
| p-HNTs/v-MA              | p-HNTs/MA composite by CVD method                            |
| PDMS-HNTs/v-MA           | PDMS-HNTs/MA composite by CVD method                         |
| p-HNTs/v-PA              | p-HNTs/PA composite by CVD method                            |
| PDMS-HNTs/v-PA           | PDMS-HNTs/PA composite by CVD method                         |
